# Supplementary material
Source: PubMed Central journal article supplement (PMC11005539)

# S1 Figure

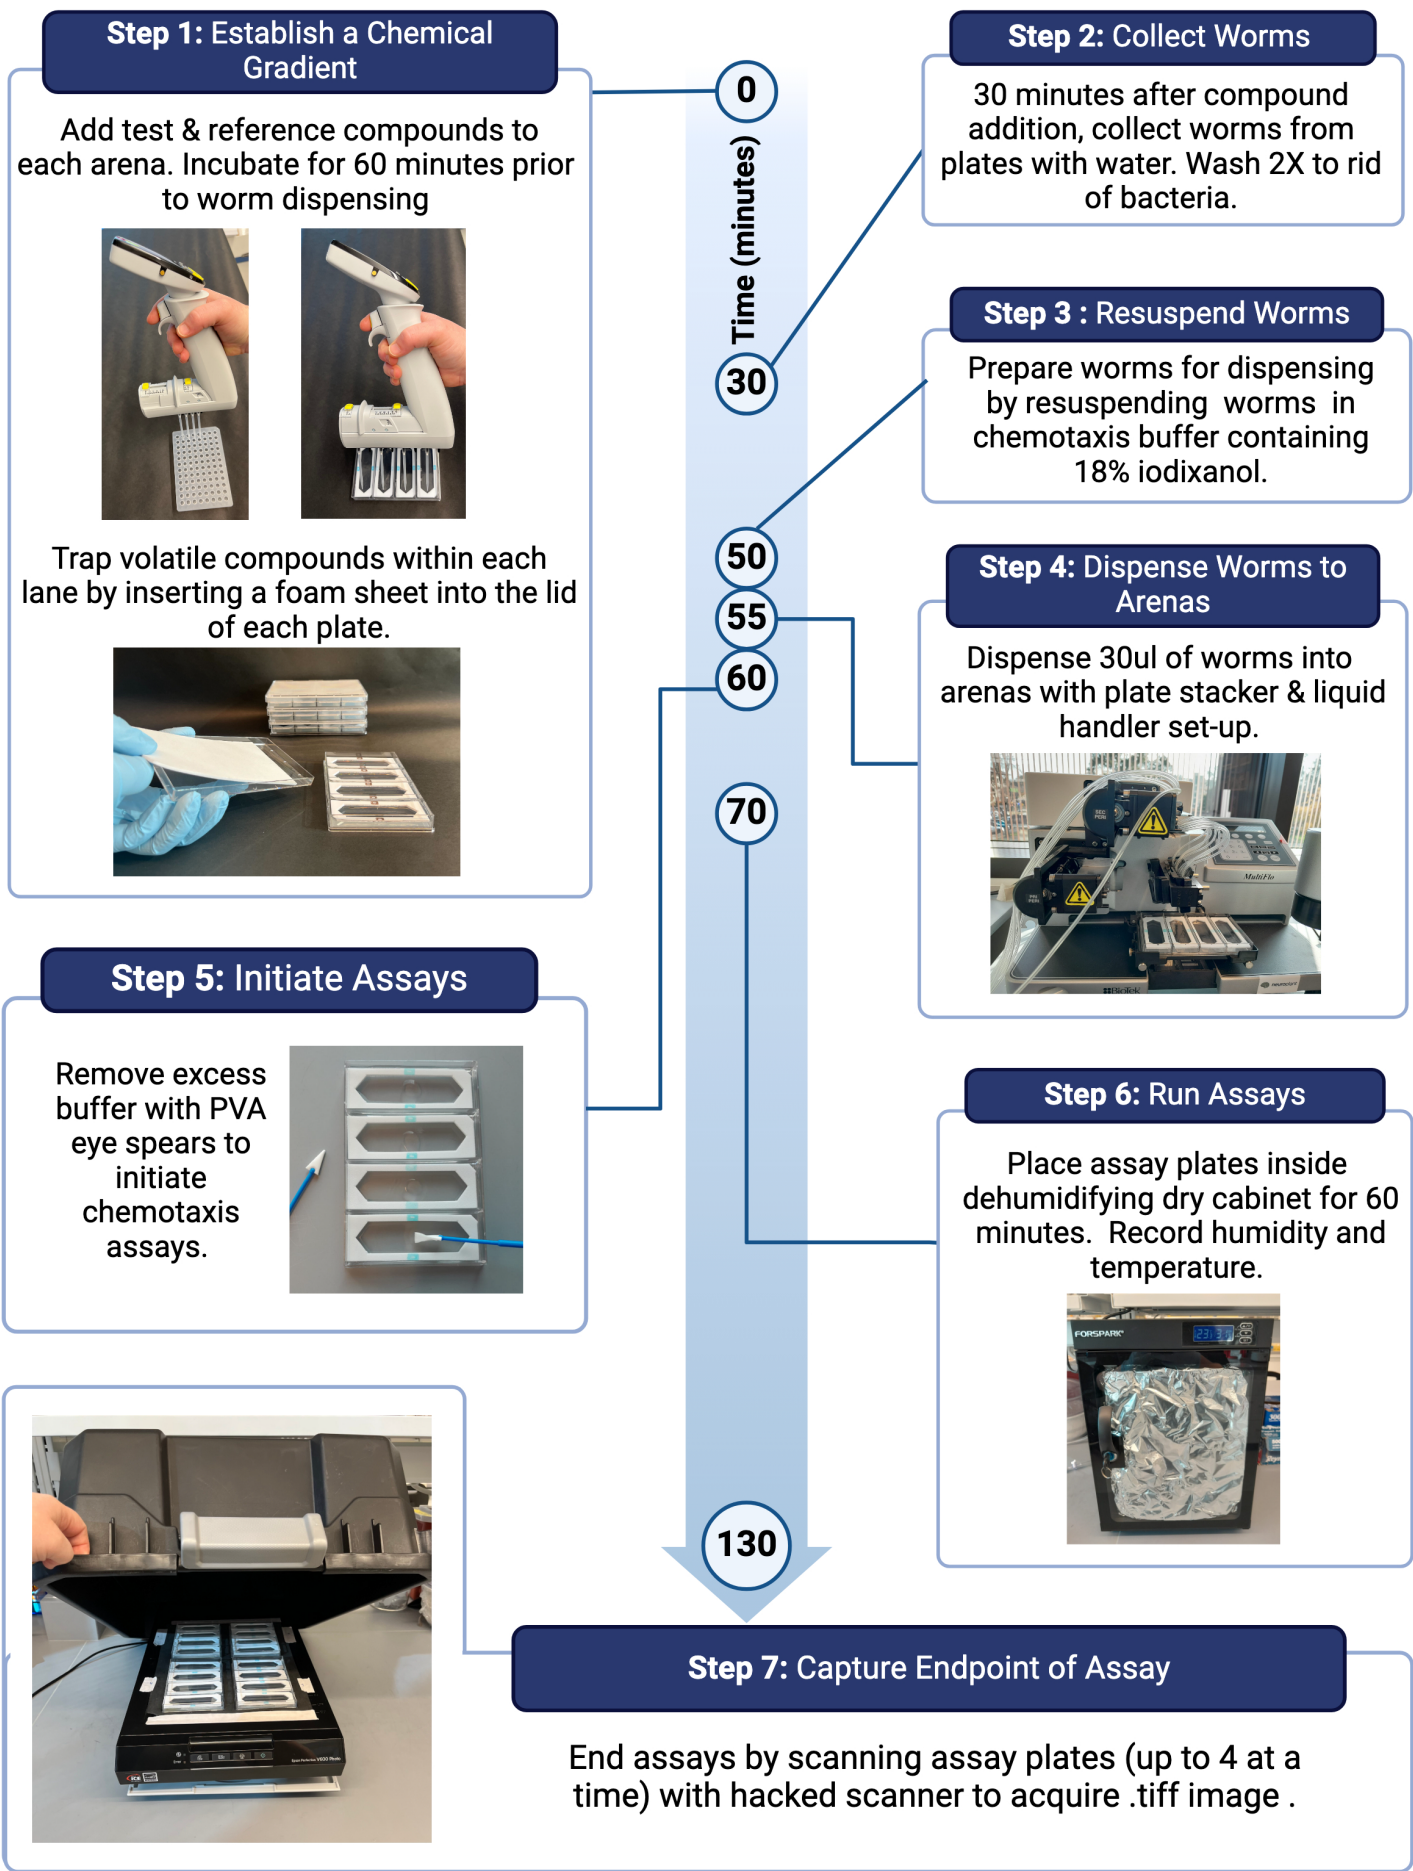

Supplement: media-1.pdf [file media-1.pdf]
