# Supplementary material
Source: PubMed Central journal article supplement (PMC11005539)

**S2 Figure**

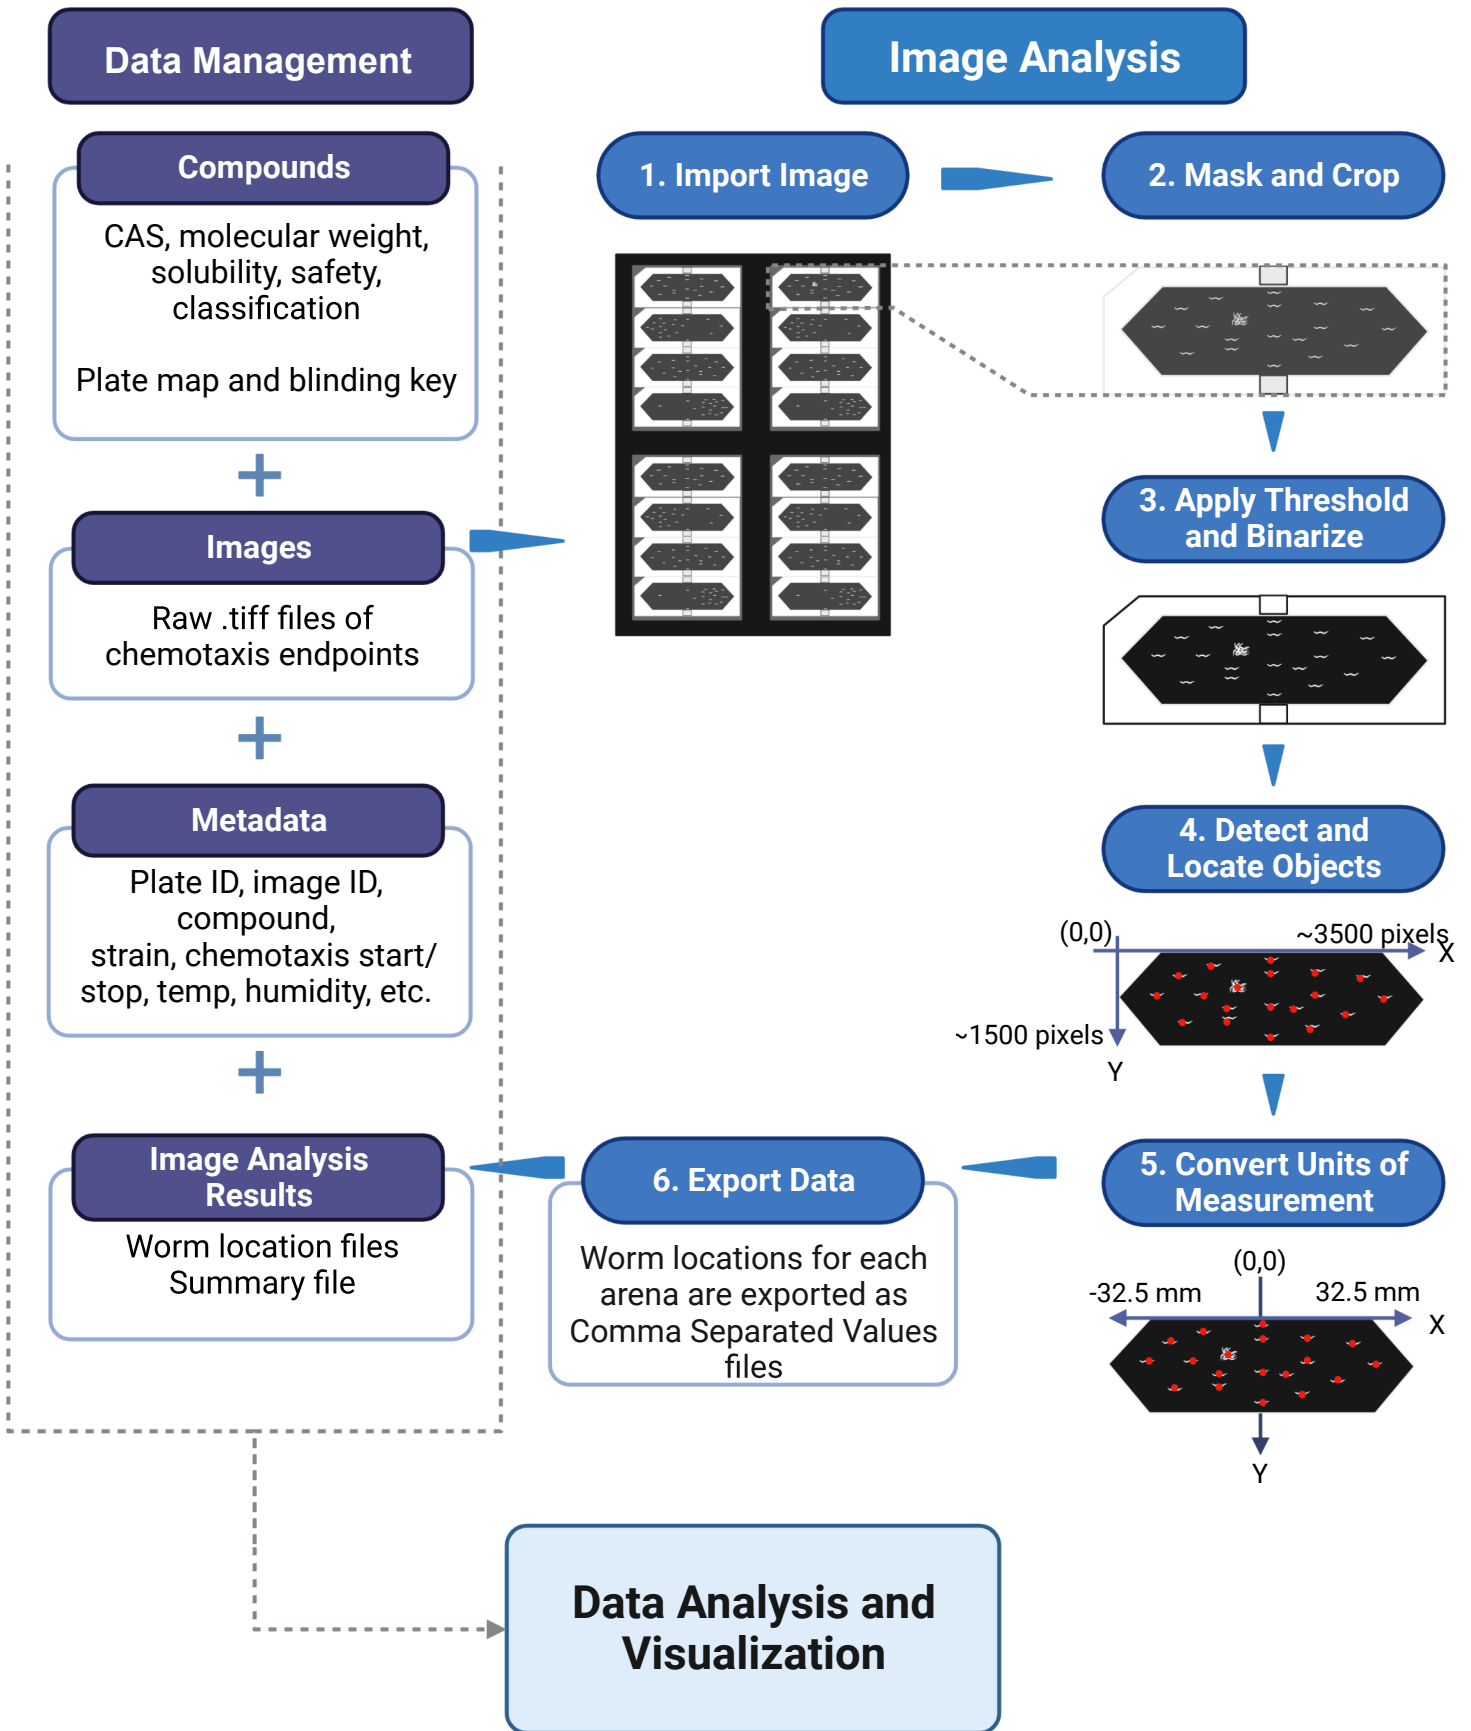

Supplement: media-2.pdf [file media-2.pdf]
